# Supplementary material
Source: publisher figshare collection journal article supplement (https://acs.figshare.com/ndownloader/files/23553300)
Supplement: Supplementary file 1 [file 23553300]

**Supplemental Table 1. The primer sequences used for qRT-PCR.**

| Gene           | Forward (5' to 3')        | Reverse (5' to 3')        |
|----------------|---------------------------|---------------------------|
| <i>SLCO2B1</i> | CTTCATCTCGGAGCCATACC      | GCTTGAGCAGTTGCCATTG       |
| <i>HNF4A</i>   | TACCTCAAAGCCATCATCTTCT    | GTTGATGTAGTCCTCCAAGCTC    |
| <i>ABCB1</i>   | CGCTGGTTTCGATGATGGAGTCA   | CATTTCCTGCTGTCTGCATTGTG   |
| <i>SLC22A1</i> | TAATGGACCACATCGCTCAA      | AGCCCCTGATAGAGCACAGA      |
| <i>ACTB</i>    | ATGTGGCCGAGGACTTTGATT     | AGTGGGGTGGCTTTTAGGATG     |
| <i>Firefly</i> | GAGGTTTGCAACAACCACATC     | TCATGTCTGCTCGAAGCG        |
| <i>Renilla</i> | GGAATTATAATGCTTATCTACGTGC | CTTGCGAAAAATGAAGACCTTTTAC |

**Supplemental Table 2. The primer sequences used for reporter gene construction.**

| Primer Name                                                                                              | Sequence |                                       |
|----------------------------------------------------------------------------------------------------------|----------|---------------------------------------|
| OATP2B1 3'UTR wild vector<br>(From stop codon to +1819)                                                  | Forward  | GCCGTGTAATTCTAGGCTGTCTTGGGGCCCCAC     |
|                                                                                                          | Reverse  | CCGCCCCGACTCTAGAAAGATTGGAAAAGATGTAATA |
| miR-24 perfect match vector                                                                              | Forward  | CTAGCTGTTCTGCTGAACTGAGCCA             |
|                                                                                                          | Reverse  | CTAGTGGCTCAGTTCAGCAGGAACAG            |
| OATP2B1 3'UTR deletion vector<br>(miR-24 binding site located at +312)                                   | Forward  | CAGCCTGGCCCACTATCTTTGCTATCCTAGGG      |
|                                                                                                          | Reverse  | CCCTAGGATAGCAAAGATAGTGGGCCAGGCTG      |
| OATP2B1 3'UTR deletion vector<br>(miR-24 binding site located at +389)                                   | Forward  | GACAGGAGATGGCTAAAGAAGGTGATCCAGGC      |
|                                                                                                          | Reverse  | GCCTGGATCACCTTCTTTAGCCATCTCCTGTC      |
| <i>SLCO2B1</i> wild vector<br>(From -1,000 upstream of the<br>transcription start site to +8 downstream) | Forward  | TGGCCTAACTGGCCGACCCAGGTCTGAGGCCTT     |
|                                                                                                          | Reverse  | CCGGATTGCCAAGCTGGCTGTTTGTGGAGGGCA     |
| <i>SLCO2B1</i> mutant vector                                                                             | Forward  | AGAGGCACAGGCTGTGGAGTTTACCATCCACAAACAG |
|                                                                                                          | Reverse  | CTGGCTGTTTGTGGATGGTAACTCCACAGCCTGTGC  |

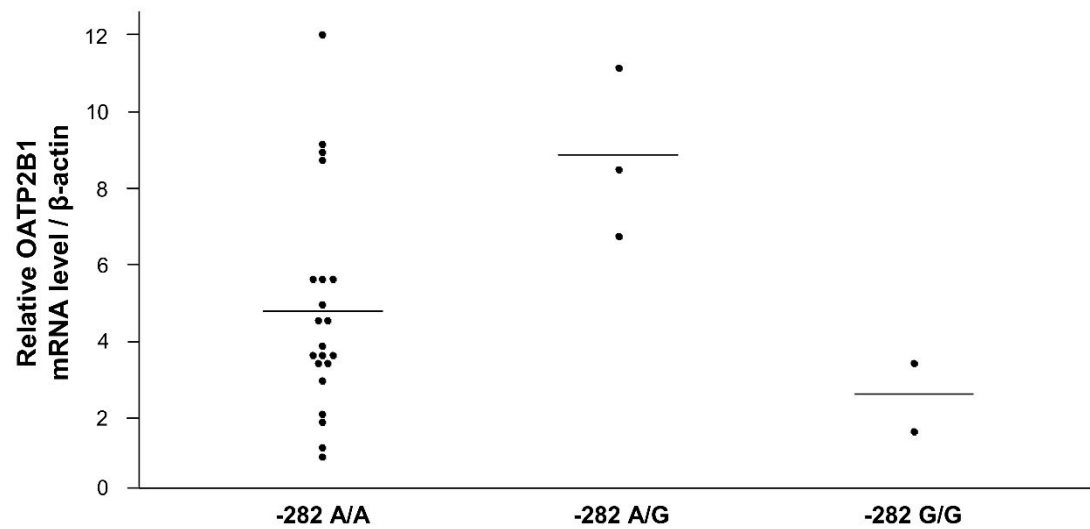

**Supplemental Figure 1. Interindividual differences in OATP2B1 mRNA expression by -282G>A genotypes in 26 human livers.**

OATP2B1 mRNA levels and the associations with -282G>A genotypes were examined in 26 human livers (21 A/A, three A/G and two G/G). OATP2B1 mRNA expression levels were evaluated by qRT-PCR.

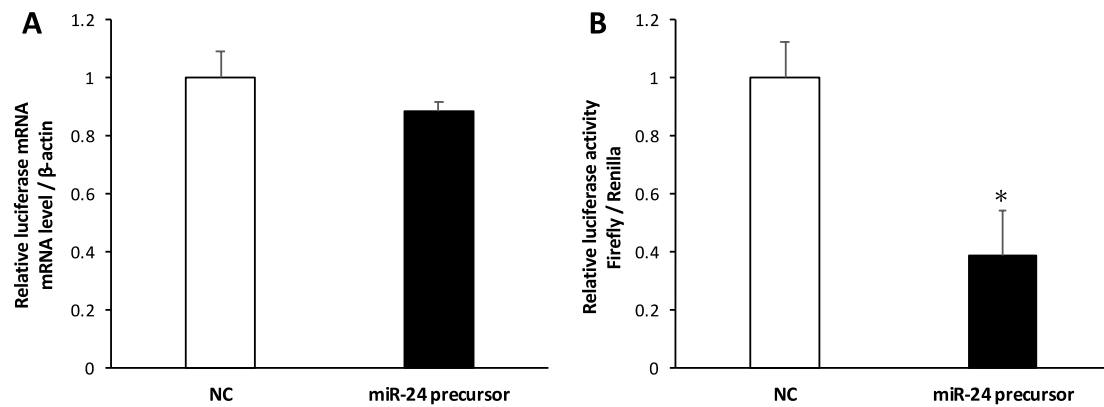

**Supplemental Figure 2. Effects of miR-24 on mRNA levels (A) and luciferase activities (B) of reporter vector containing full-length OATP2B1 mRNA 3'UTR.**

HepG2 cells were transfected with the miR-24 precursor or negative control precursor (NC). After 24 h, the OATP2B1 3'UTR wild vector were used to transfect HepG2 cells. Relative luciferase activity was normalized to renilla luciferase activity. All means  $\pm$  S.D. were analyzed by t-test. \*,  $P < 0.05$ : significantly different from the NC.

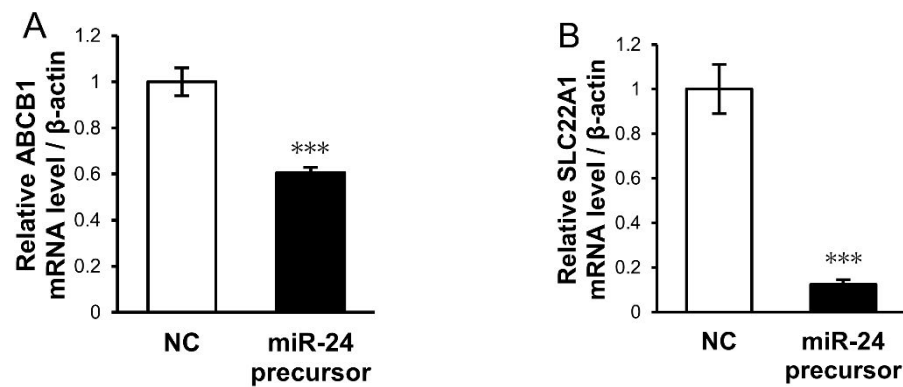

**Supplemental Figure 3. Effects of miR-24 on ABCB1 (A) and SLC22A1 (B) mRNA levels.**

HepaRG cells were transfected with the miR-24 precursor or negative control precursor (NC). ABCB1 and SLC22A1 mRNA levels were evaluated by qRT-PCR. All mean  $\pm$  S.D. were analyzed by *t*-test. \*\*\*,  $P < 0.001$ : significantly different from the NC.
